# Supplementary material for: Senolytic Flavonoids Enhance Type-I and Type-II Cell Death in Human Radioresistant Colon Cancer Cells through AMPK/MAPK Pathway
Source: MDPI journal article supplement (doi:10.3390/cancers15092660), 2023-05-08

# **SENOLYTIC FLAVONOIDS ENHANCE TYPE-I AND TYPE-II CELL DEATH IN HUMAN RADIORESISTANT COLON CANCER CELLS THROUGH AMPK/MAPK PATHWAY**

**Maria Russo<sup>\*</sup>, Stefania Moccia<sup>†</sup>, Diomira Luongo<sup>†</sup> and Gian Luigi Russo**

Institute of Food Sciences, National Research Council, 83100 Avellino, Italy; stefania.moccia@isa.cnr.it (S.M.); diomira.luongo@isa.cnr.it (D.L.); glrusso@isa.cnr.it (G.L.R.)

\* Correspondence: maria.russo@isa.cnr.it; Tel.: +39-0825299331

† These authors contributed equally to this work.

**SUPPLEMENTARY MATERIALS: uncropped immunoblottings**

# Figure 2

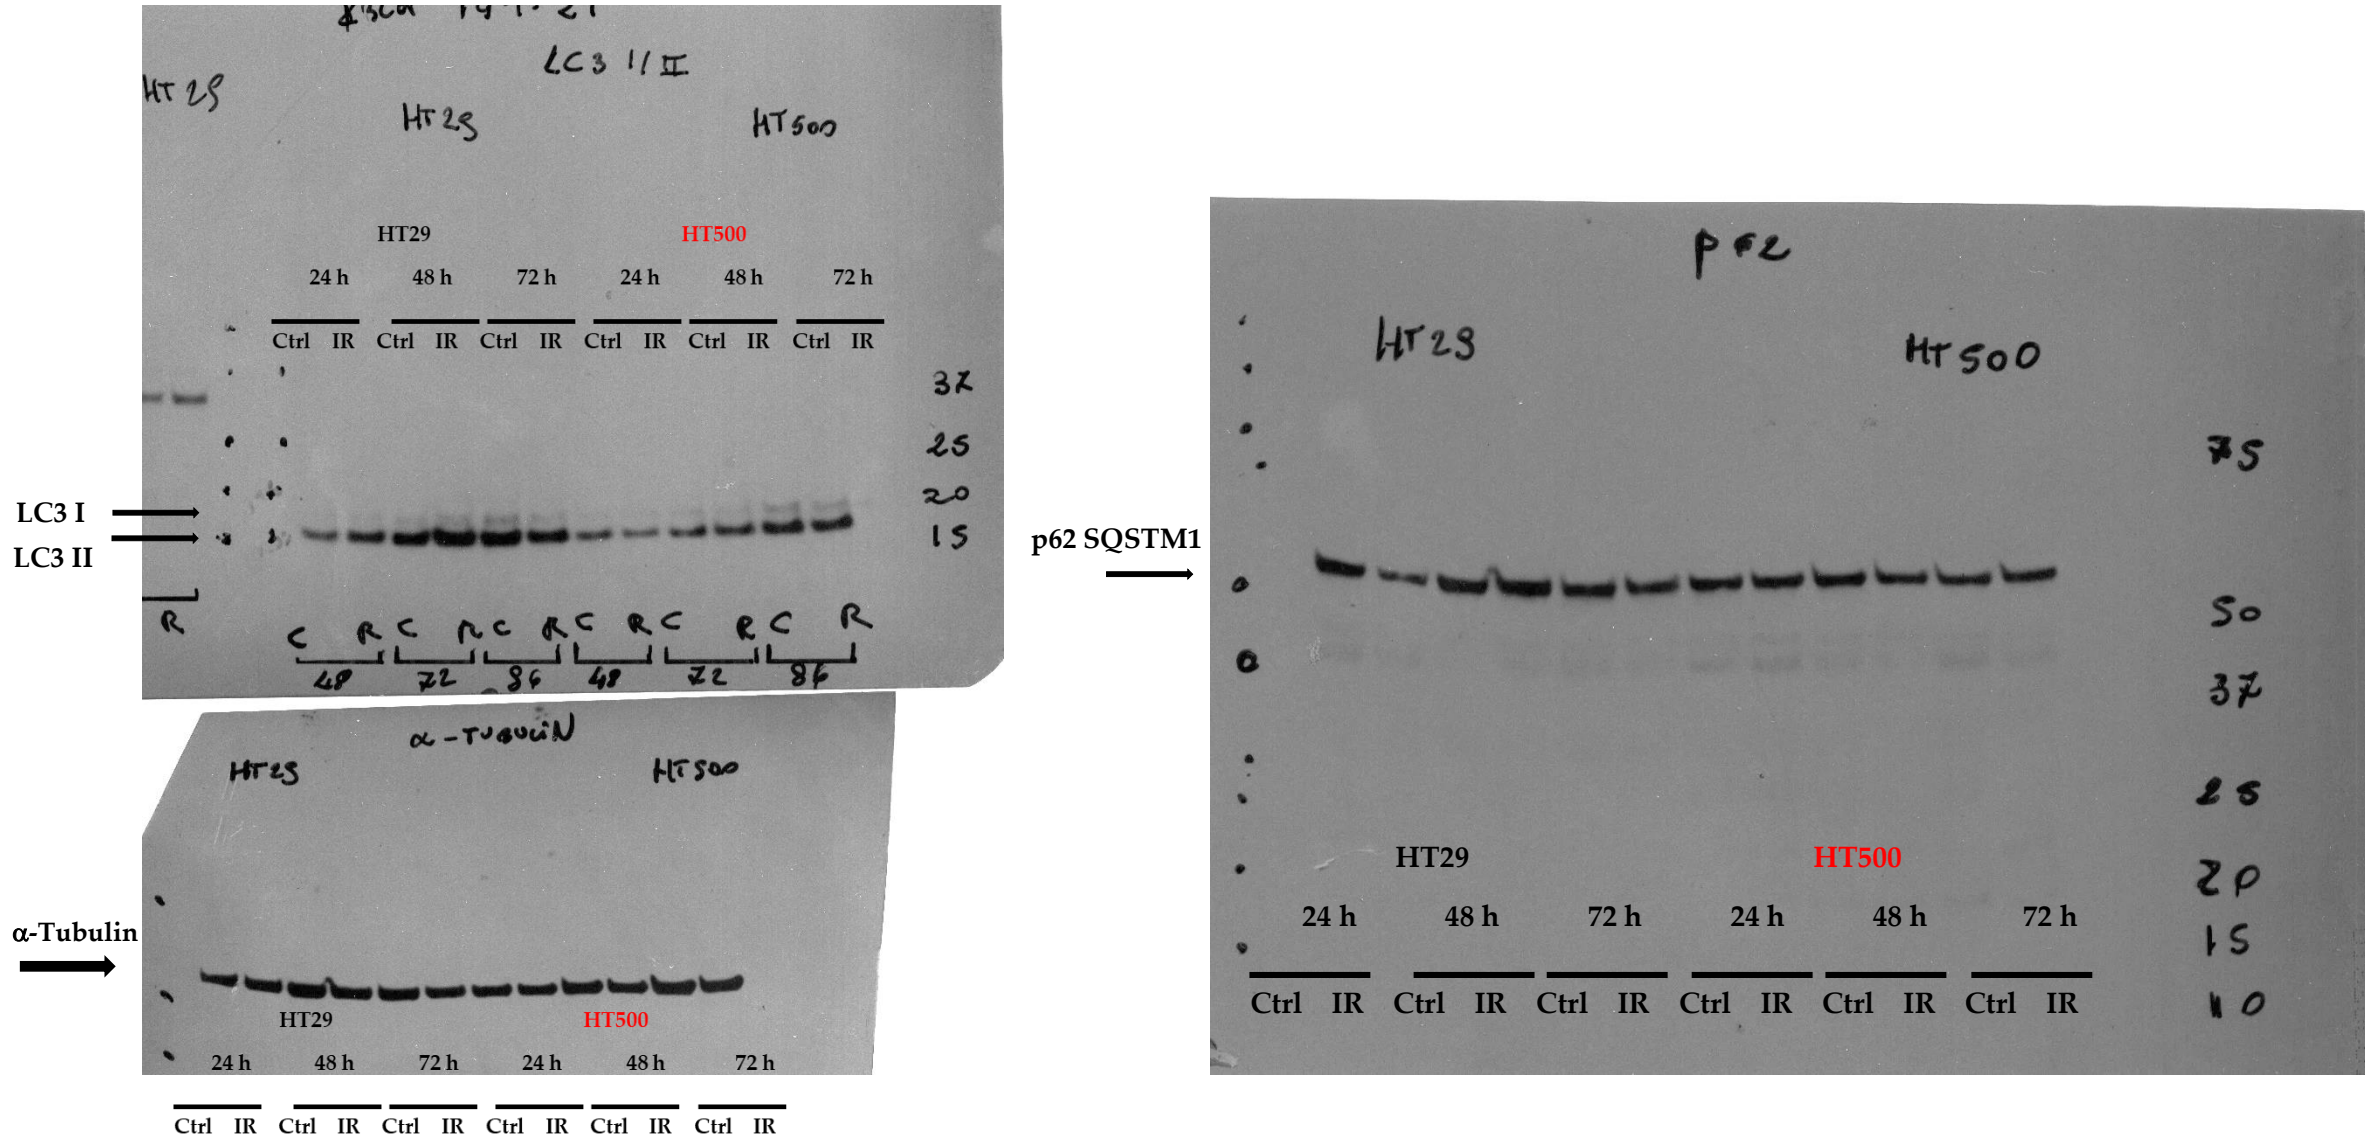

Figure 5 a

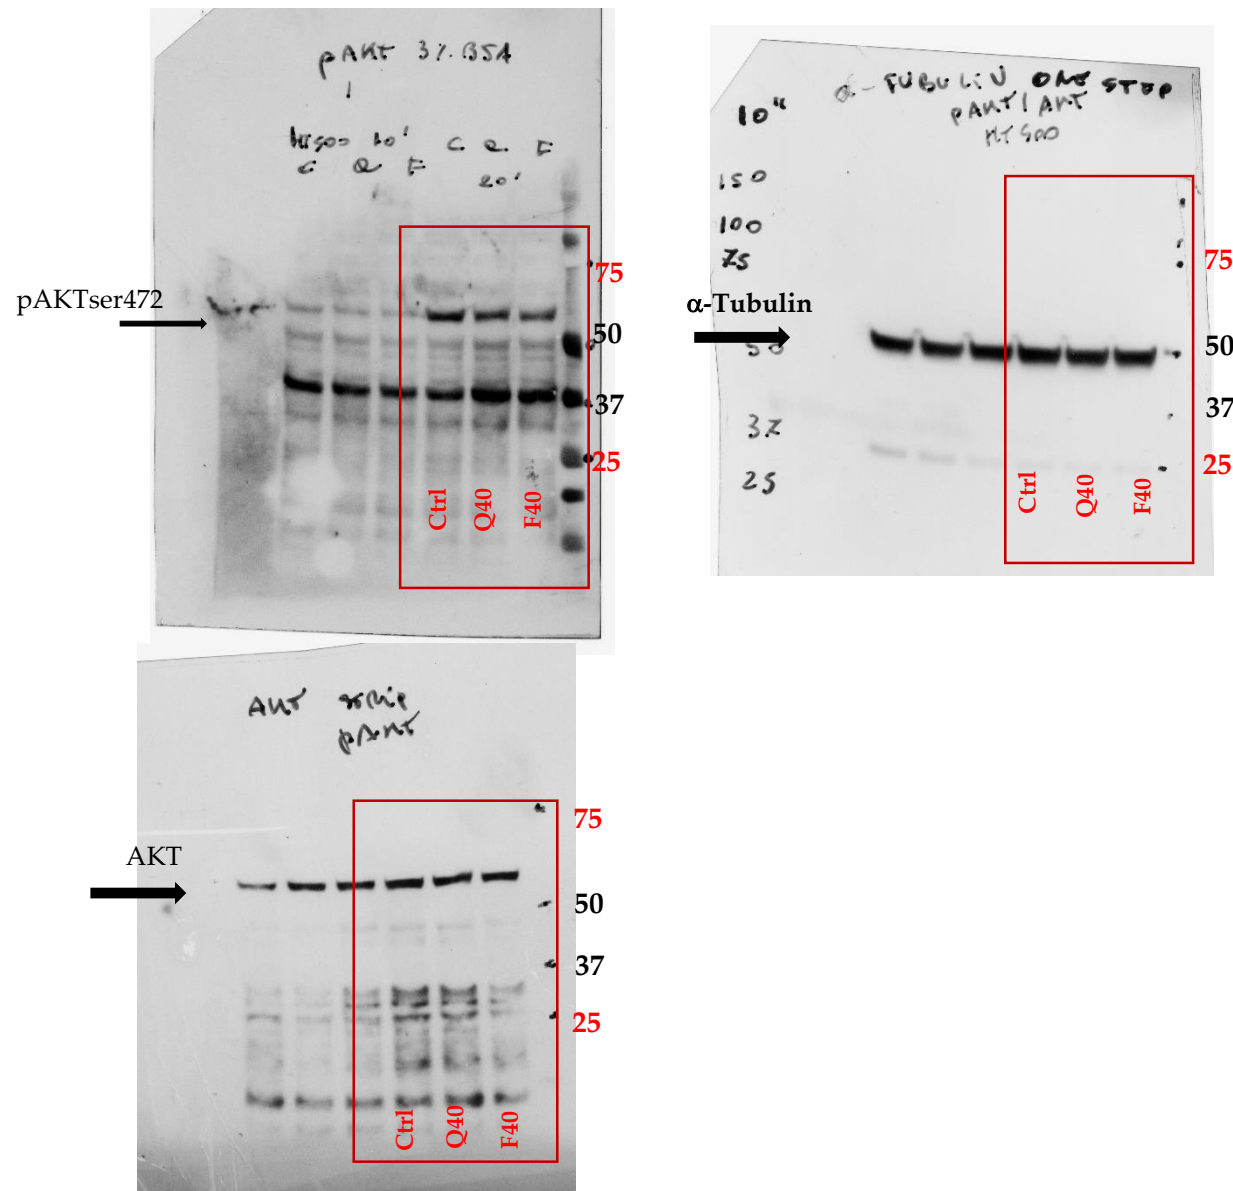

Figure 5 b

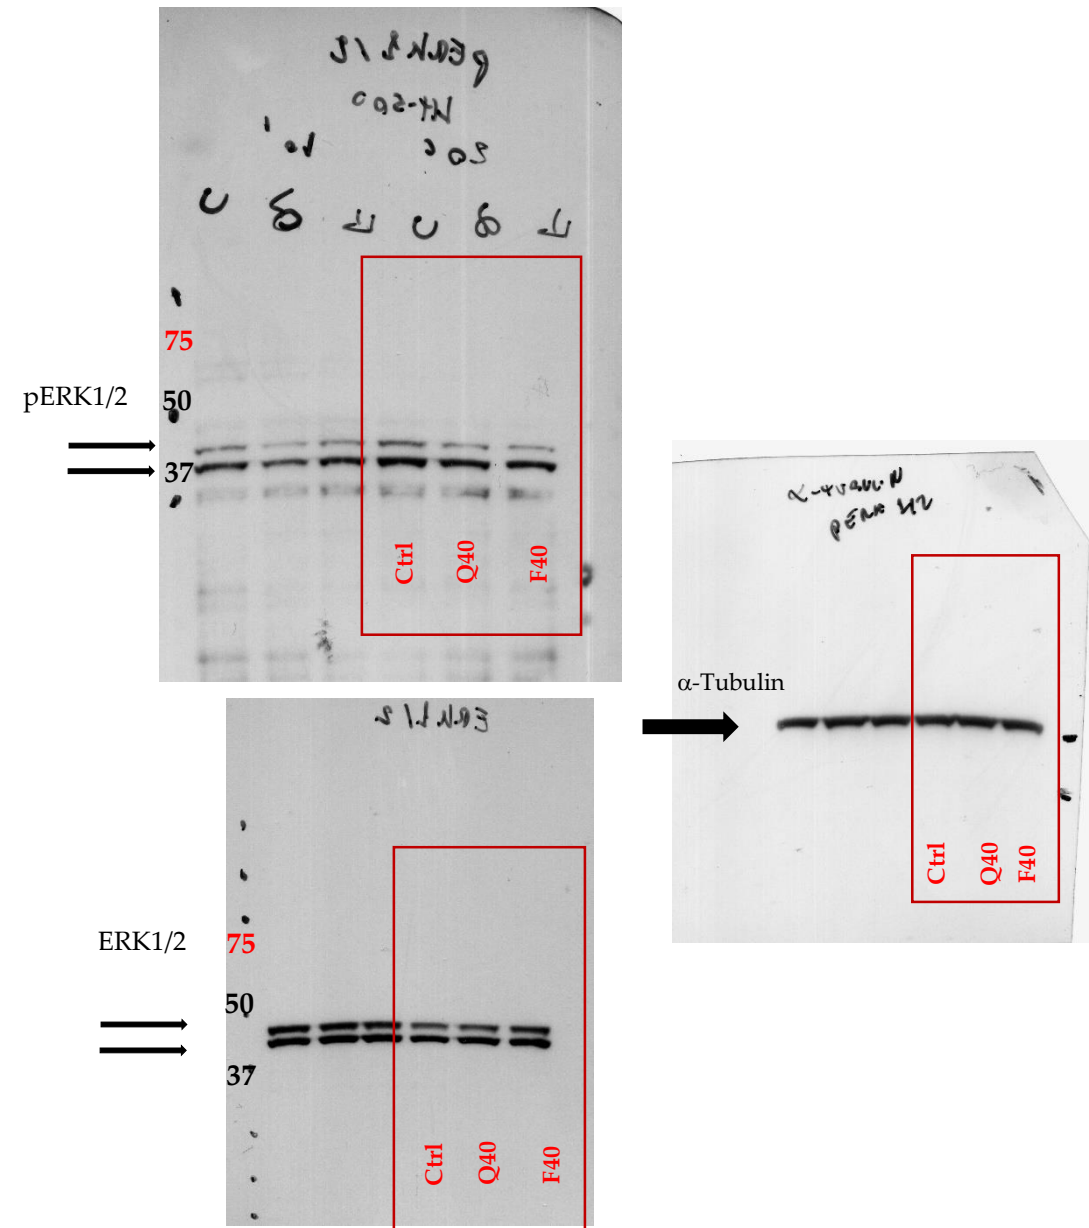

Figure 5 e

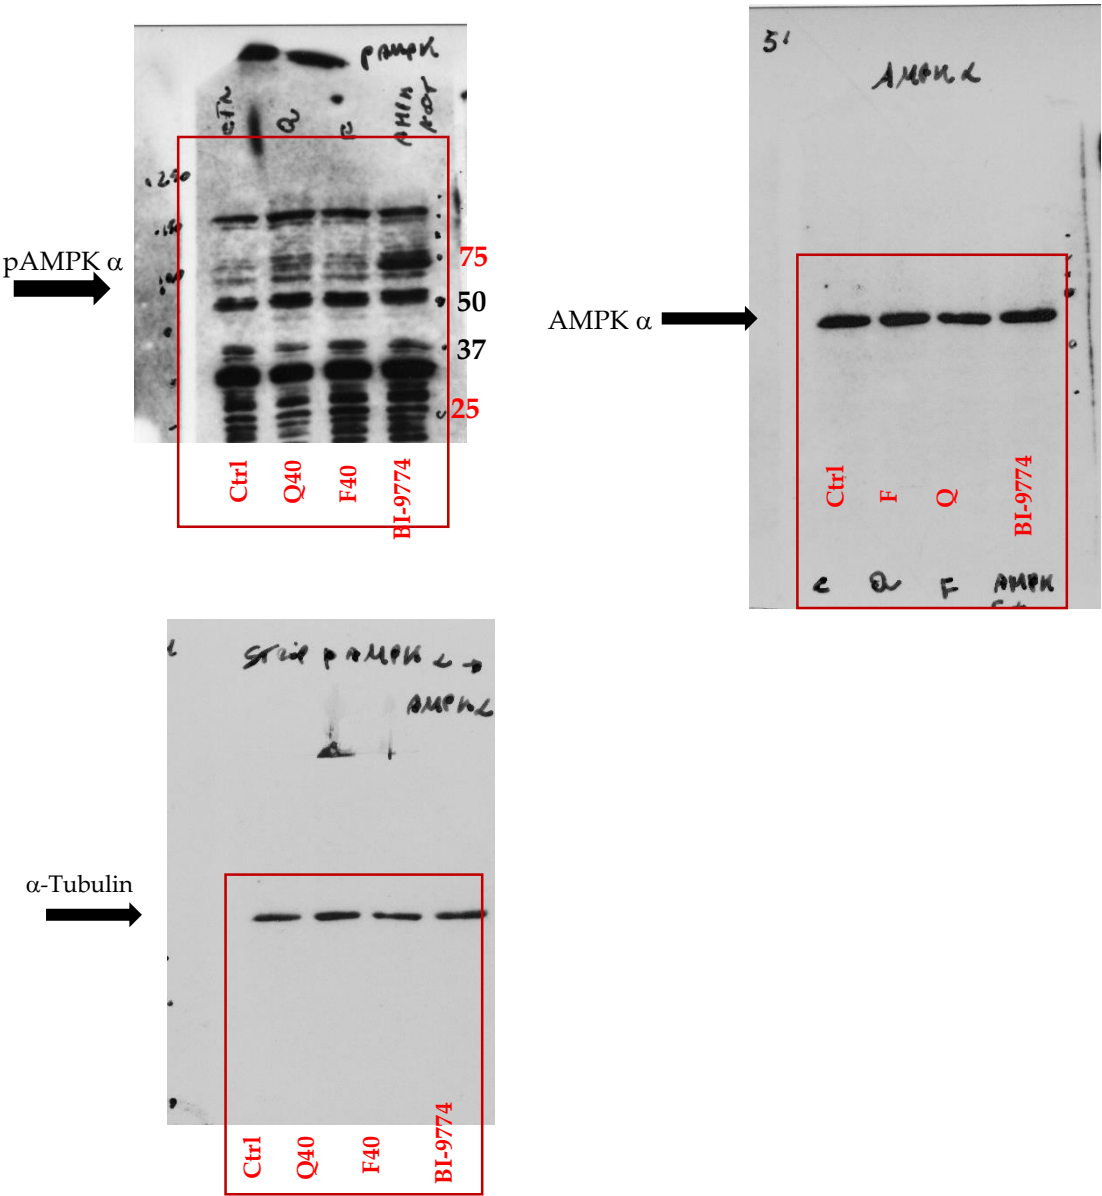

Figure 5 f

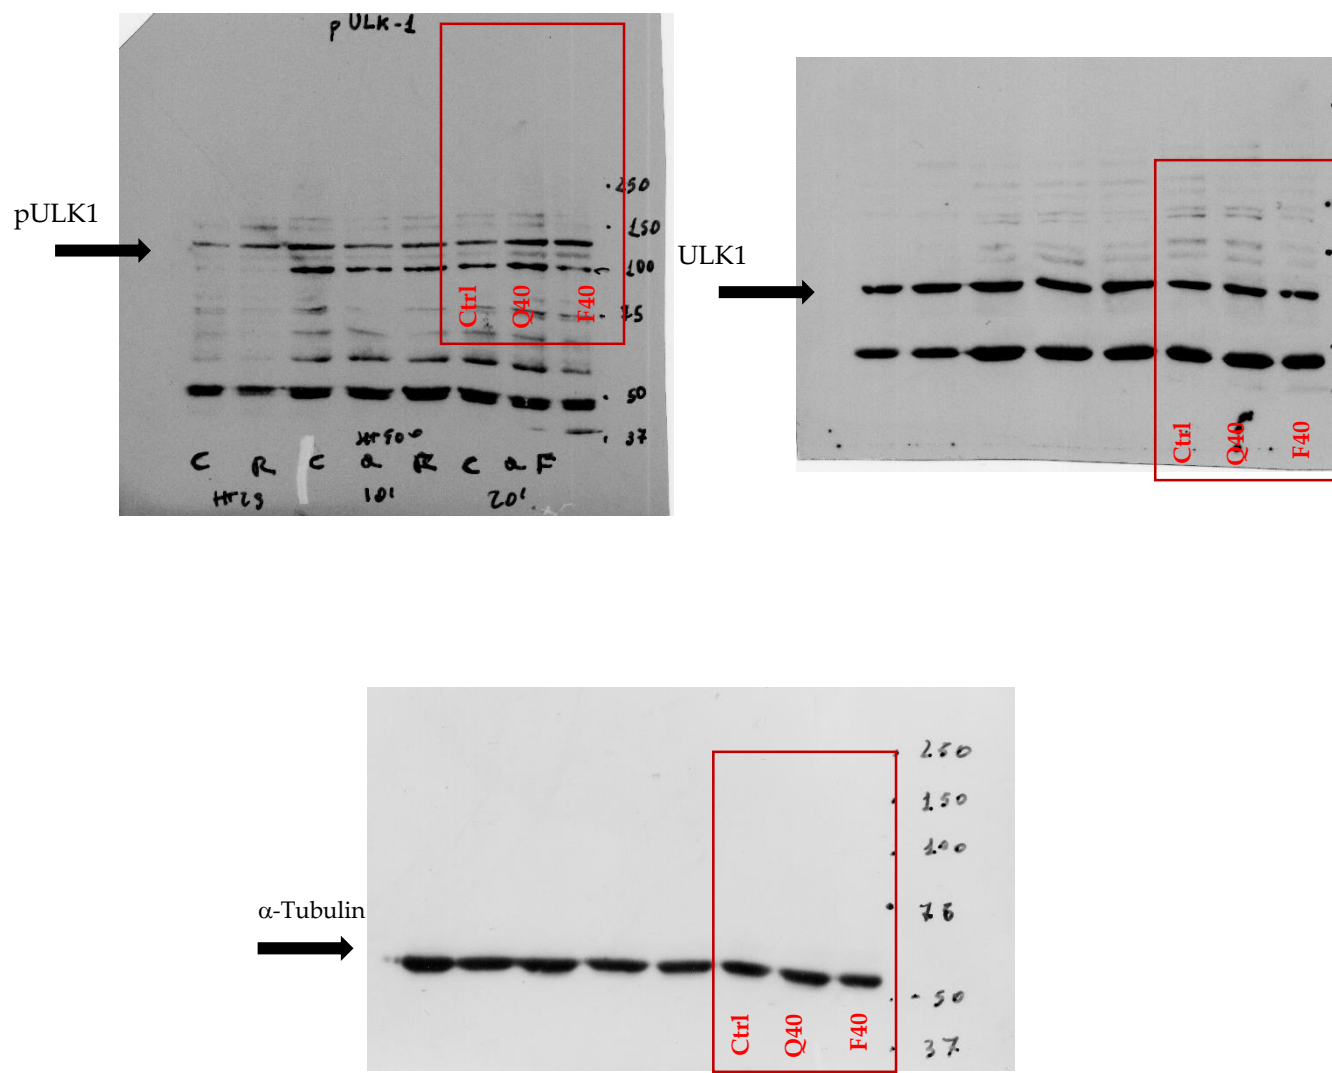



Figure 6 a

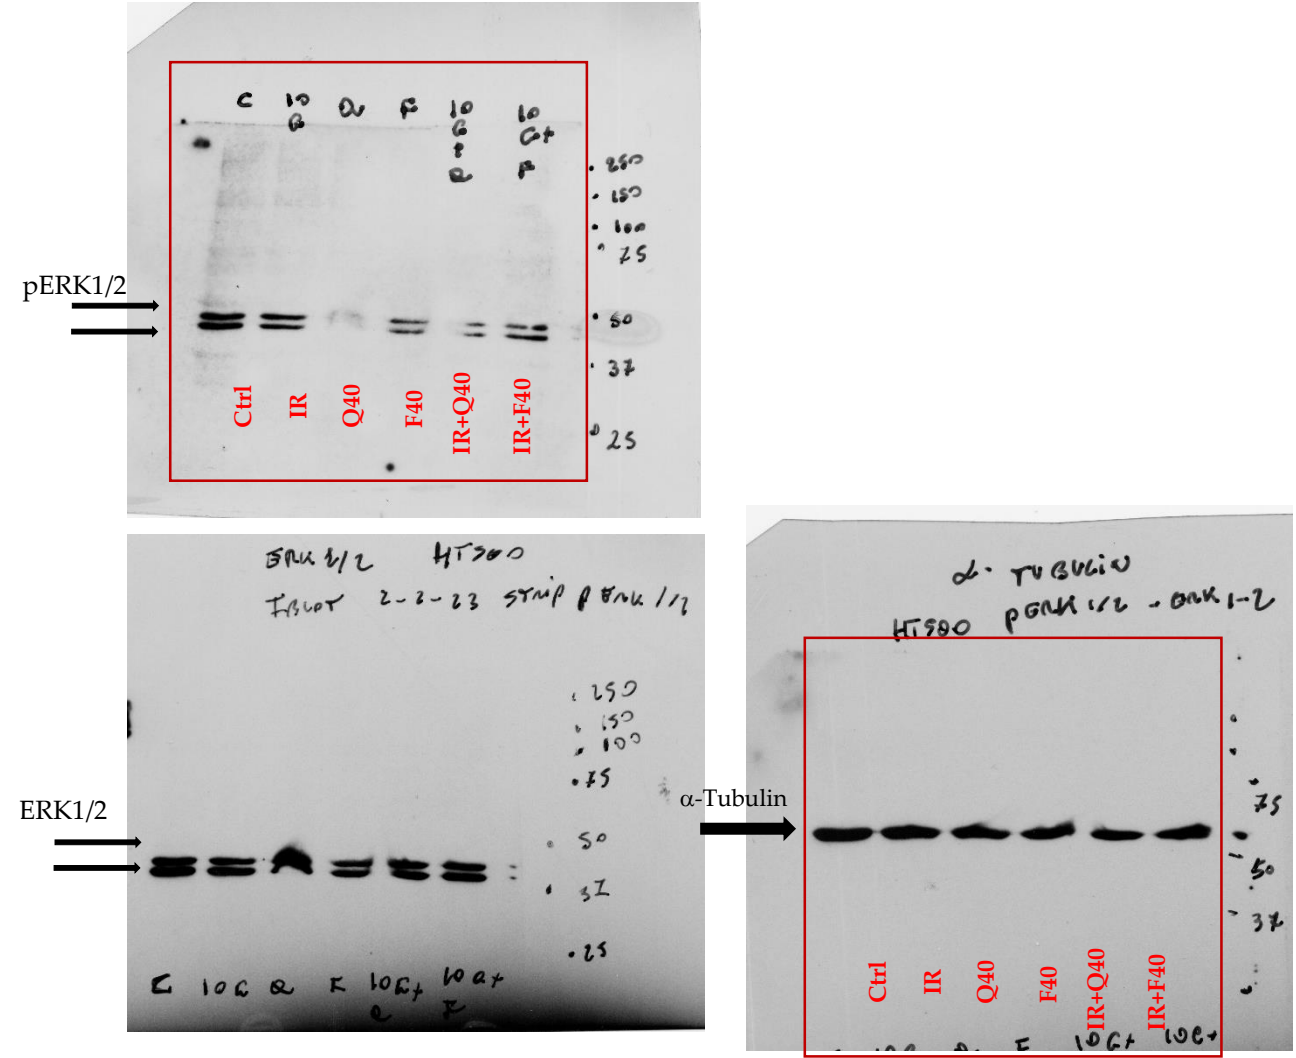

Figure 6 c

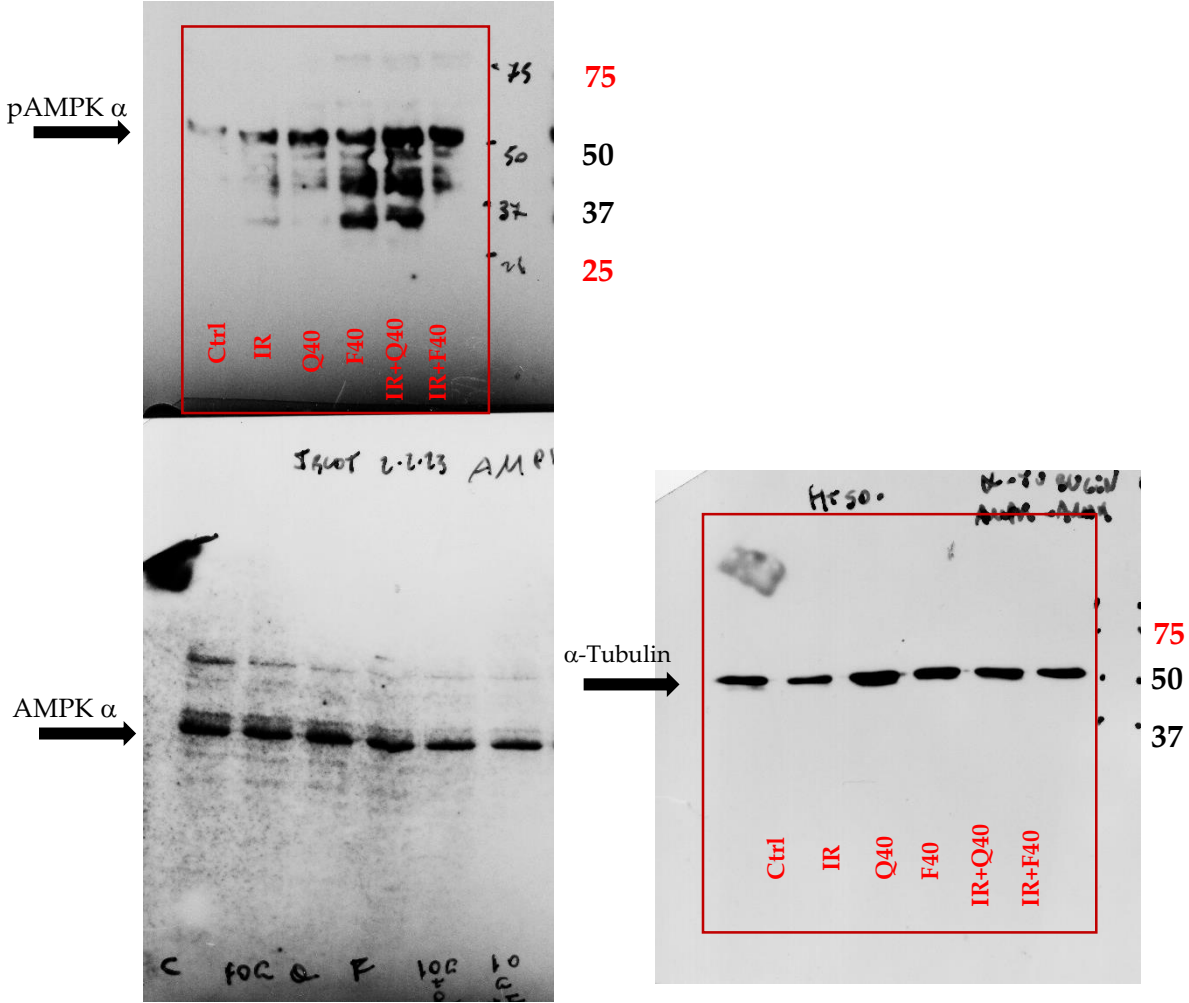

Figure 8 a

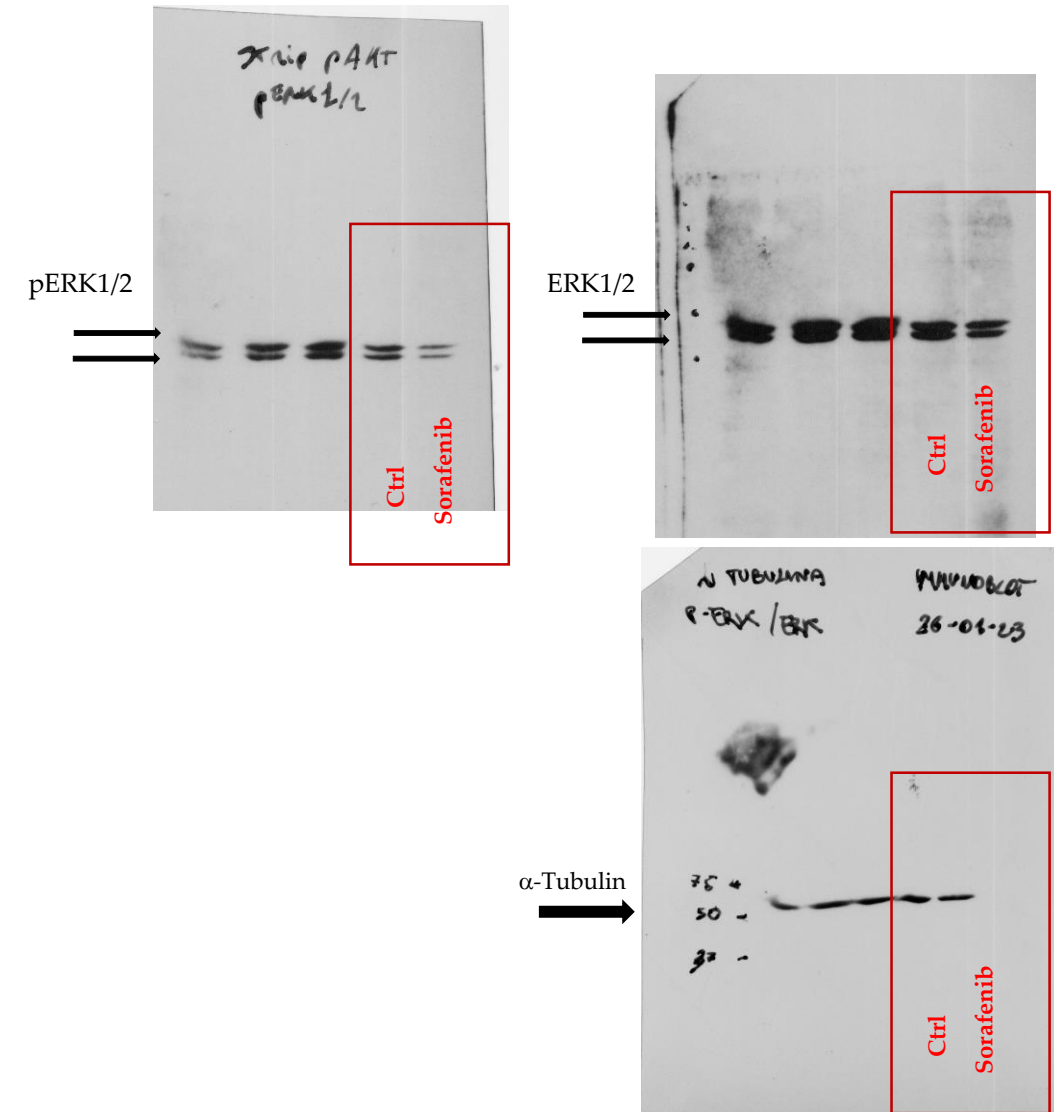

Figure 8 b

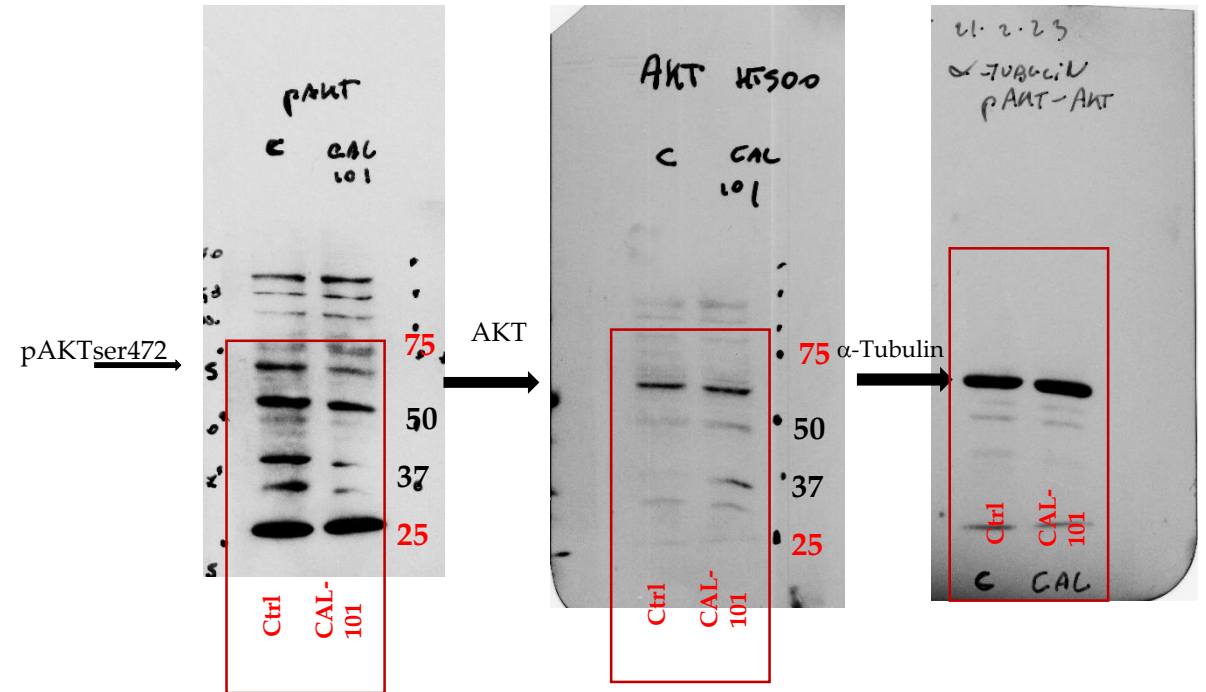

Figure S2

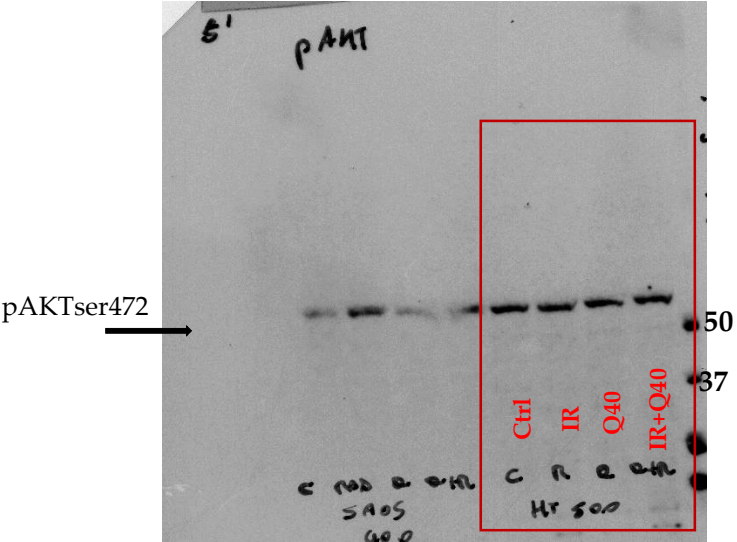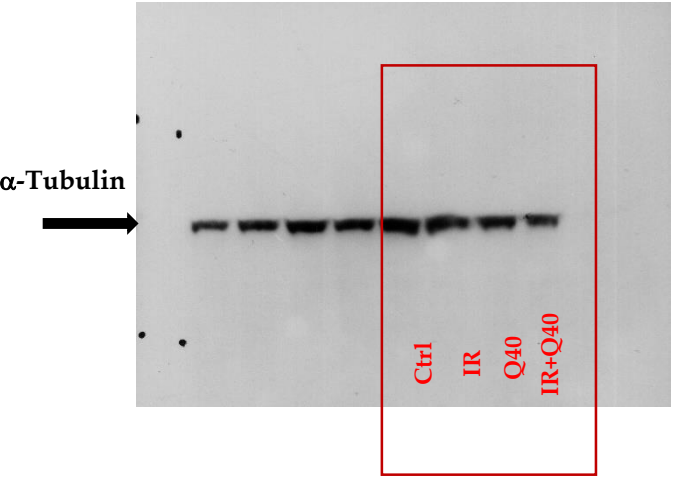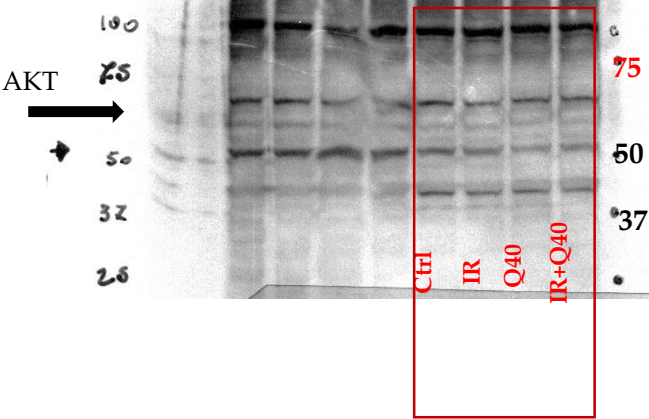

Supplement: s1 [file s1]
